# Supplementary material for: Risk Assessment of Passive Smoking Based on Analysis of Hair Nicotine and Cotinine as Exposure Biomarkers by In-Tube Solid-Phase Microextraction Coupled On-Line to LC-MS/MS
Source: MDPI journal article supplement (doi:10.3390/molecules26237356), 2021-12-03
Supplement: s1 [file s1]

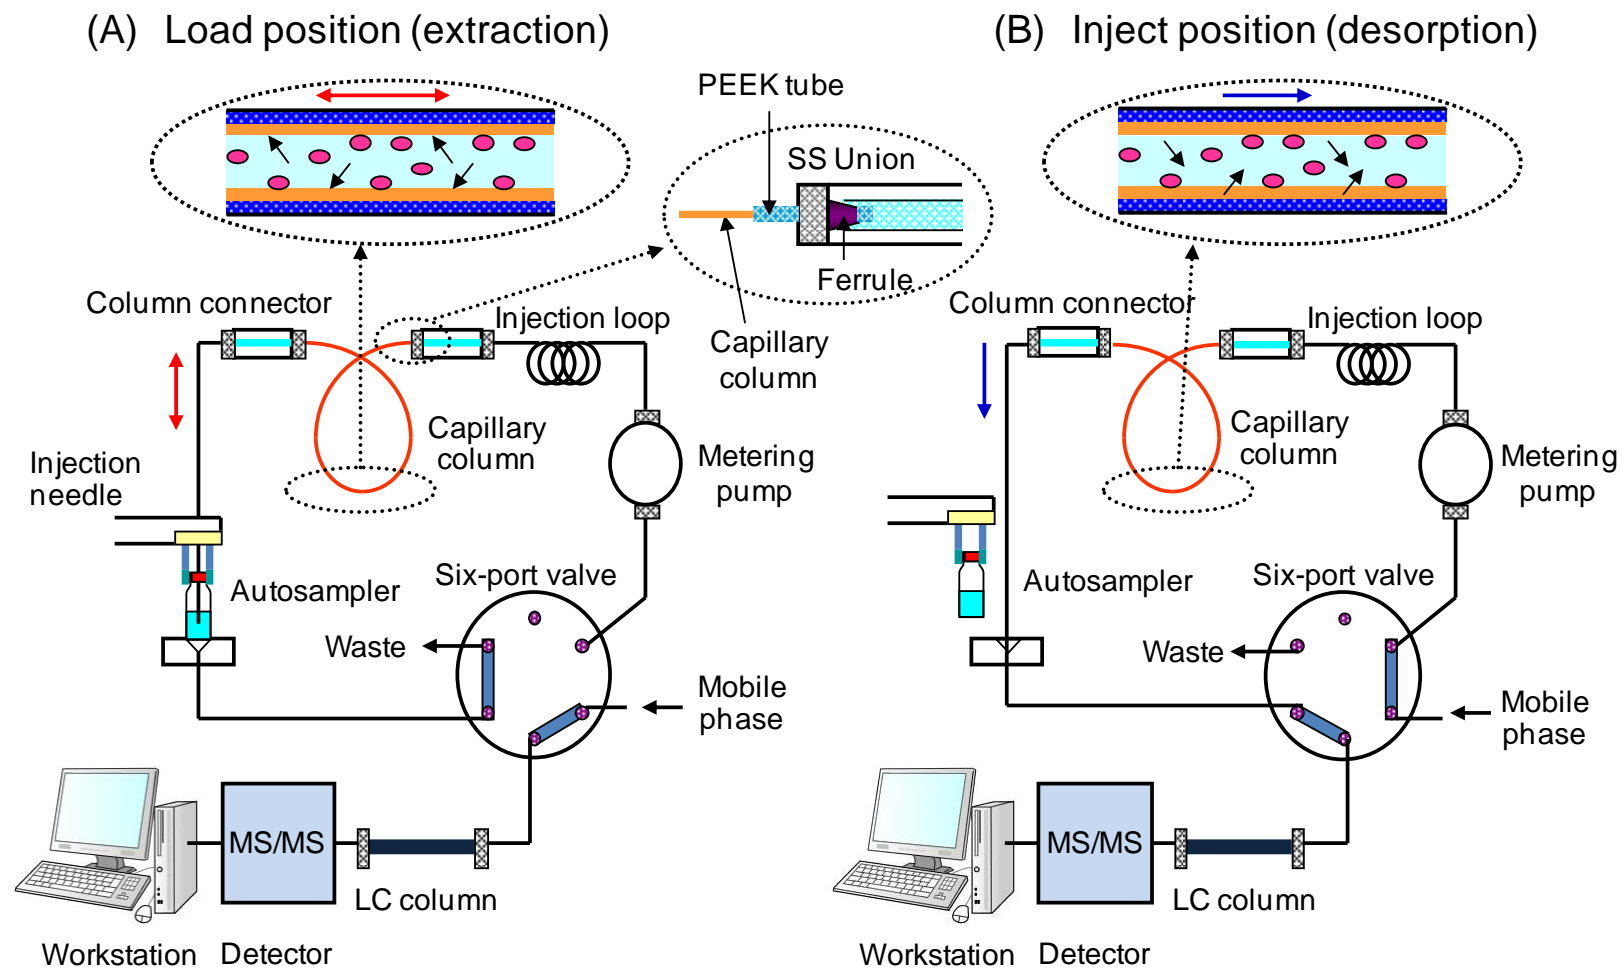

**Figure S1.** Outline of online in-tube SPME LC-MS/MS system (A) load position (extraction) and (B) inject position (desorption).

**Table S1.** Linearity, sensitivity and precisions of nicotine and cotinine by in-tube SPME LC-MS/MS.

| Compound | Linearity                       |                                          | LOD <sup>2)</sup> (pg mL <sup>-1</sup> ) |                 | Concentration<br>(pg mL <sup>-1</sup> ) | Precision (RSD <sup>3)</sup> %), (n = 5) |           |
|----------|---------------------------------|------------------------------------------|------------------------------------------|-----------------|-----------------------------------------|------------------------------------------|-----------|
|          | Range<br>(pg mL <sup>-1</sup> ) | Correlation<br>coefficient <sup>1)</sup> | Direct<br>injection                      | In-tube<br>SPME |                                         | Intra-day                                | Inter-day |
| Nicotine | 5–1000                          | 0.9997                                   | 8.56                                     | 0.45            | 20                                      | 1.62                                     | 2.42      |
|          |                                 |                                          |                                          |                 | 200                                     | 1.64                                     | 5.97      |
| Cotinine | 5–1000                          | 0.9992                                   | 2.68                                     | 0.13            | 20                                      | 3.37                                     | 2.35      |
|          |                                 |                                          |                                          |                 | 200                                     | 3.12                                     | 2.49      |

<sup>1)</sup> n = 24. <sup>2)</sup> Limits of detection (signal to noise ratio of 3). <sup>3)</sup> RSD, relative standard deviation.

**Table S2.** Program for the in-tube SPME process.

| Sequence | Event                                                | Switching<br>valve | Vial   | Draw / Ejection     |                |                                  |
|----------|------------------------------------------------------|--------------------|--------|---------------------|----------------|----------------------------------|
|          |                                                      |                    |        | Cycle <sup>1)</sup> | Volume<br>(μL) | Speed<br>(μL min <sup>-1</sup> ) |
| 1        | Conditioning of the capillary                        | Load               | MeOH   | D/E (2)             | 40             | 200                              |
| 2        | Drawing of air into the capillary                    | Load               | Empty  | D (1)               | 50             | 200                              |
| 3        | Conditioning of the capillary                        | Load               | Water  | D/E (2)             | 40             | 200                              |
| 4        | Extraction of analytes into the capillary            | Load               | Sample | D/E (20)            | 40             | 200                              |
| 5        | Needle washing                                       | Load               | MeOH   | D/E (1)             | 2              | 200                              |
| 6        | Desorption of analytes from the capillary            | Inject             | –      | –                   | –              | –                                |
| 7        | HPLC separation of analytes and return to sequence 1 | Load               | –      | –                   | –              | –                                |

<sup>1)</sup> D: draw, E: ejection.

**Table S3.** MS/MS transitions and setting parameters for nicotine, cotinine and their stable isotope-labeled compounds.

| Compound                | Mass transition (m/z) | Dwell time (msec) | DP (V) | EP (V) | CE (eV) | CXP (V) |
|-------------------------|-----------------------|-------------------|--------|--------|---------|---------|
| Nicotine (Quantifier)   | 163.1 → 132.1         | 166.5             | 60     | 5      | 20      | 10      |
| Nicotine (Qualifier)    | 163.1 → 106.1         | 166.5             | 60     | 10     | 30      | 10      |
| Nicotine-d <sub>3</sub> | 166.1 → 132.0         | 166.5             | 60     | 5      | 20      | 10      |
| Cotinine (Quantifier)   | 177.1 → 80.2          | 166.5             | 70     | 15     | 40      | 15      |
| Cotinine (Qualifier)    | 177.1 → 98.1          | 166.5             | 60     | 10     | 30      | 10      |
| Cotinine-d <sub>3</sub> | 180.1 → 80.1          | 166.5             | 70     | 15     | 40      | 15      |
